# Supplementary material
Source: publisher site journal article supplement (https://www.spandidos-publications.com/3890/downloadSupplementary)

Figure S1. Apoptosis pathway. Using the Kyoto Encyclopedia of Genes and Genomes pathway analysis and the data obtained from the RNA-seq analysis, four genes were found to be associated with apoptosis. ITPR3 (red) is the only one downregulated. The upregulated genes (green) are: CTSPB or cathepsin, CHOP and GADD45.

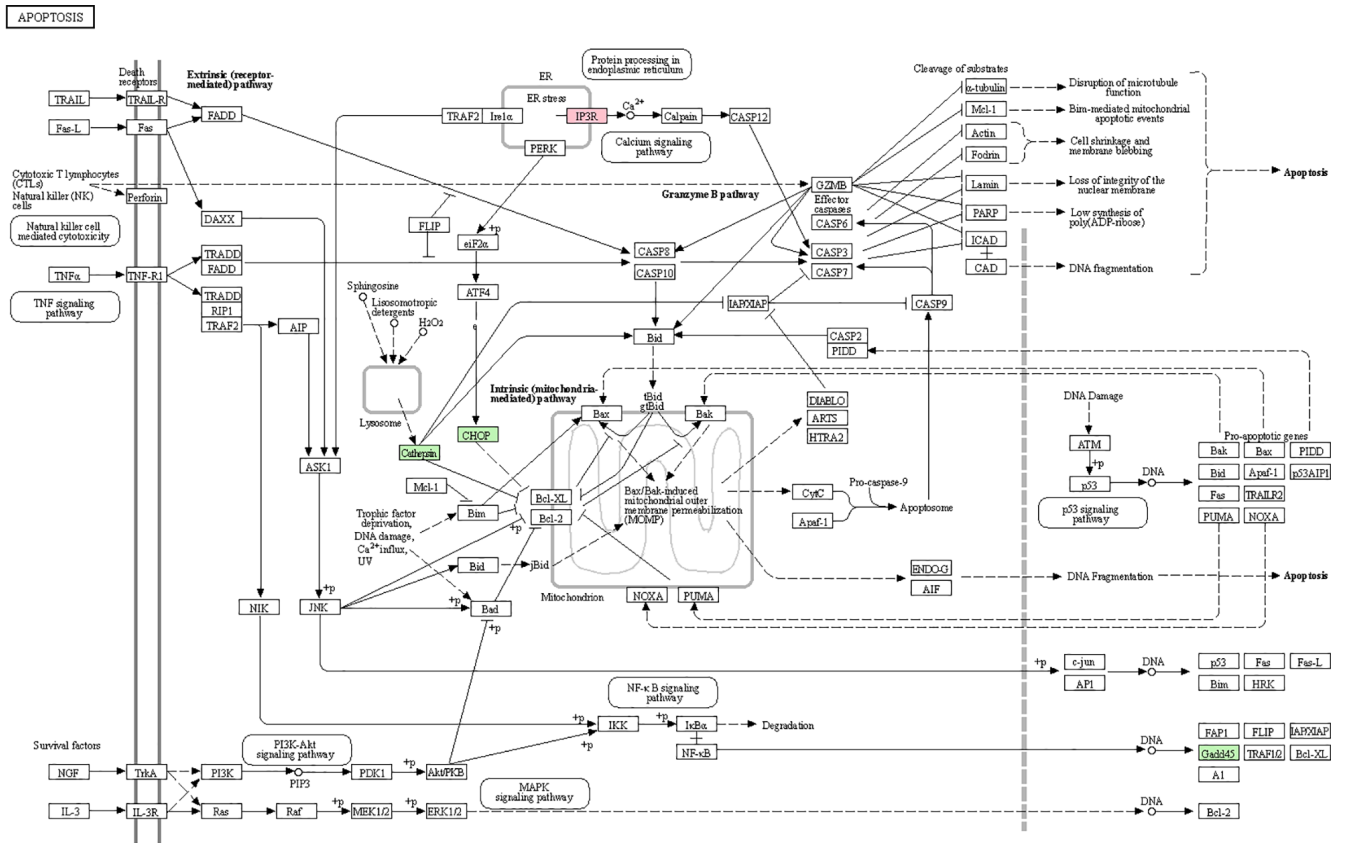

Supplement: Supplementary file 1 [file downloadSupplementary]
